# Supplementary material
Source: Research Square preprint supplement (doi:10.21203/rs.3.rs-9017459/v1)
Supplement: Supplementary file 2 [file 1e258613ceed01662f54677d.pdf]

# MLPA REPORT

**Order-No :** 252170022

**DNA-No :** 140F12SDP

**Project :**

**Patient :** P-140F12SDP

**Patient-ID :** 140F12SDP

**Family-ID :**

**MV :** 09/04/2025 Sutter, Christian (cs)

**Results:**

|                |                                                                 |                   |
|----------------|-----------------------------------------------------------------|-------------------|
| <b>P248-B1</b> | <b>(140F12SDP_P248-B1_F_P)2_MLPA_20250826_IS_ABI 08/26/2025</b> | <b>All vs all</b> |
| deletion       | 02 p21 MSH2                                                     | E07 160           |
| <b>P248-B1</b> | <b>(140F12SDP_P248-B1_F_P)1_MLPA_20250826_IS_ABI 08/26/2025</b> | <b>All vs all</b> |
| deletion       | 02 p21 MSH2                                                     | E07 160           |

**Resultfile:** (140F12SDP\_P248-B1\_F\_P)2\_MLPA\_202 08/26/2025 14:35:00 P248-B1

**Control:** (20711-1-1\_P248-B1\_F\_C)\_MLPA\_202508 08/26/2025 14:35:00 P248-B1 compl. TV tm [09/04/2025 12:54:21]  
**Control:** (20814-1-1\_P248-B1\_F\_C)\_MLPA\_202508 08/26/2025 14:35:00 P248-B1 compl. TV tm [09/04/2025 12:53:55]  
**Control:** (21550-1-1\_P248-B1\_F\_C)\_MLPA\_202508 08/26/2025 14:35:00 P248-B1 compl. TV tm [09/04/2025 12:53:34]

**Analysis Mode: All vs all**

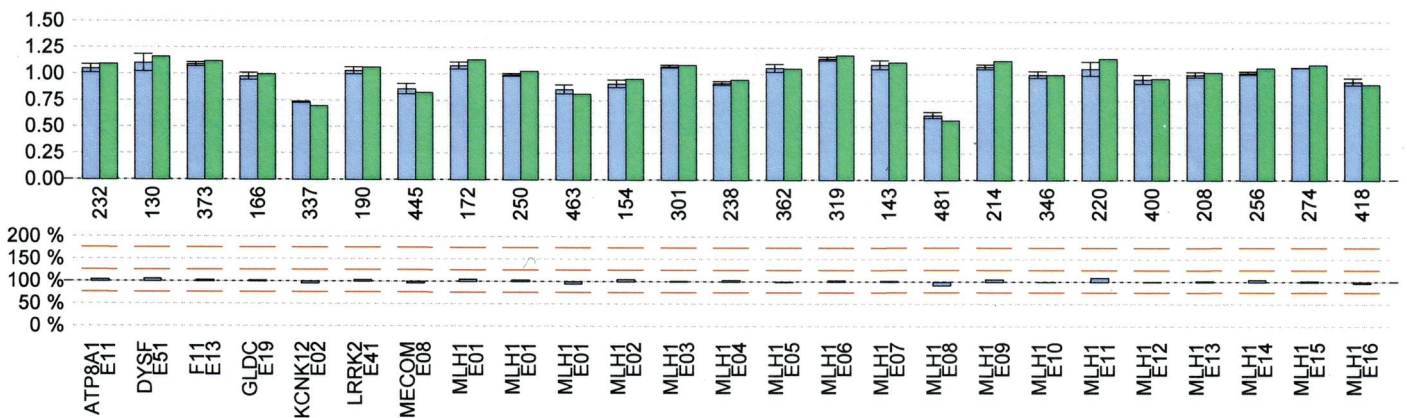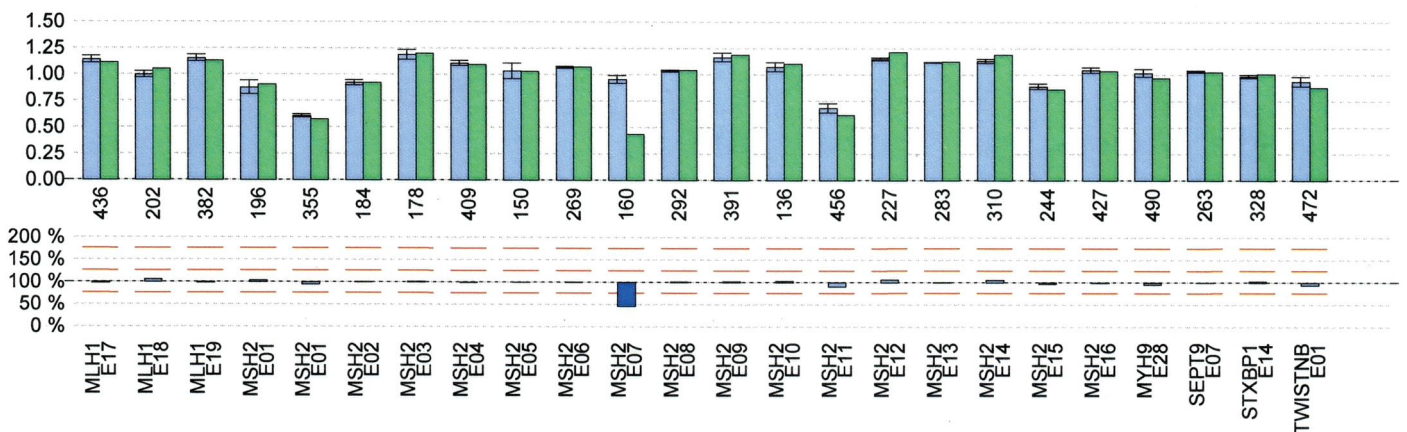

Resultfile: (140F12SDP\_P248-B1\_F\_P)1\_MLPA\_202 08/26/2025 14:35:00 P248-B1

Control: (20711-1-1\_P248-B1\_F\_C)\_MLPA\_202508 08/26/2025 14:35:00 P248-B1 compl. TV tm [09/04/2025 12:54:21]

Control: (20814-1-1\_P248-B1\_F\_C)\_MLPA\_202508 08/26/2025 14:35:00 P248-B1 compl. TV tm [09/04/2025 12:53:55]

Control: (21550-1-1\_P248-B1\_F\_C)\_MLPA\_202508 08/26/2025 14:35:00 P248-B1 compl. TV tm [09/04/2025 12:53:34]

Analysis Mode: All vs all

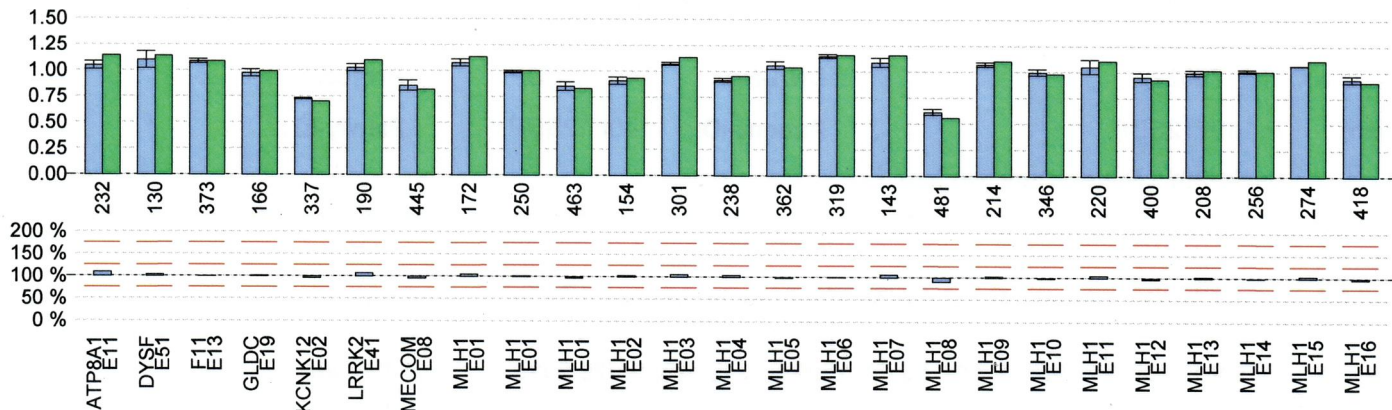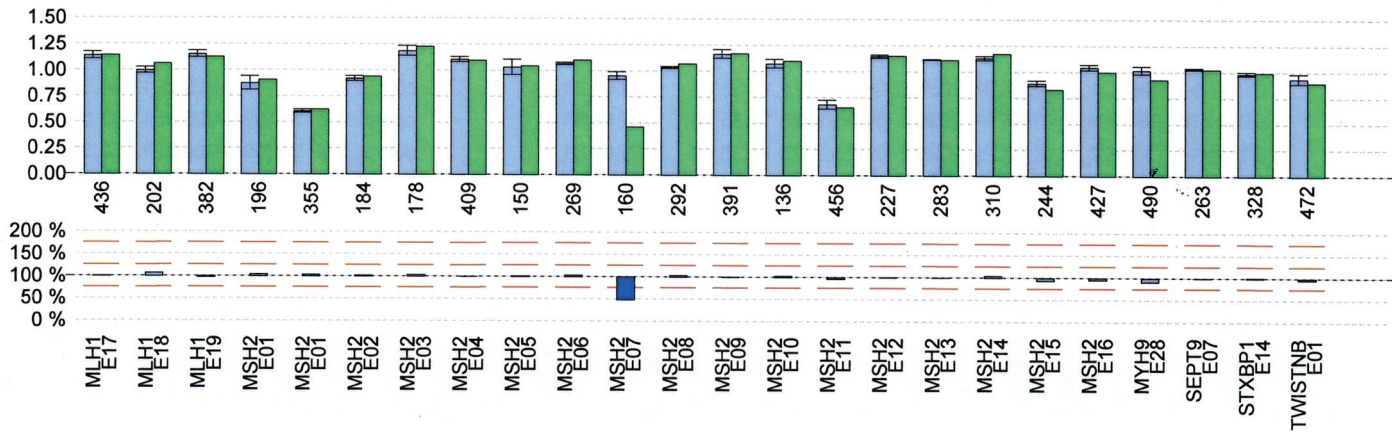

Comment:

# MLPA REPORT

Order-No : 252170022

DNA-No : 140F12SDP

Project :

Patient : P-140F12SDP

Patient-ID : 140F12SDP

Family-ID :

MV : 08/19/2025 Sutter, Christian (cs)

**Results:**

**P003-D1 (140F12SDP\_P003-D1\_F\_P)1\_MLPA\_20250819\_IS\_1\_0 08/19/2025**  
 deletion 02 p21 MSH2

**All vs all**  
 E07 249

Resultfile: (140F12SDP\_P003-D1\_F\_P)1\_MLPA\_202 08/19/2025 12:57:00 P003-D1

Control: (20814-1-1\_P003-D1\_F\_C)\_MLPA\_20250819\_IS\_1\_0 08/19/2025 12:57:00 P003-D1 compl. TV is [08/19/2025 14:57:54]  
 Control: (21550-1-1\_P003-D1\_F\_C)\_MLPA\_20250819\_IS\_1\_0 08/19/2025 12:57:00 P003-D1 compl. TV is [08/19/2025 14:59:30]  
 Control: (20711-1-1\_P003-D1\_F\_C)\_MLPA\_20250819\_IS\_1\_0 08/19/2025 12:57:00 P003-D1 compl. TV is [08/19/2025 14:56:22]

**Analysis Mode: All vs all**

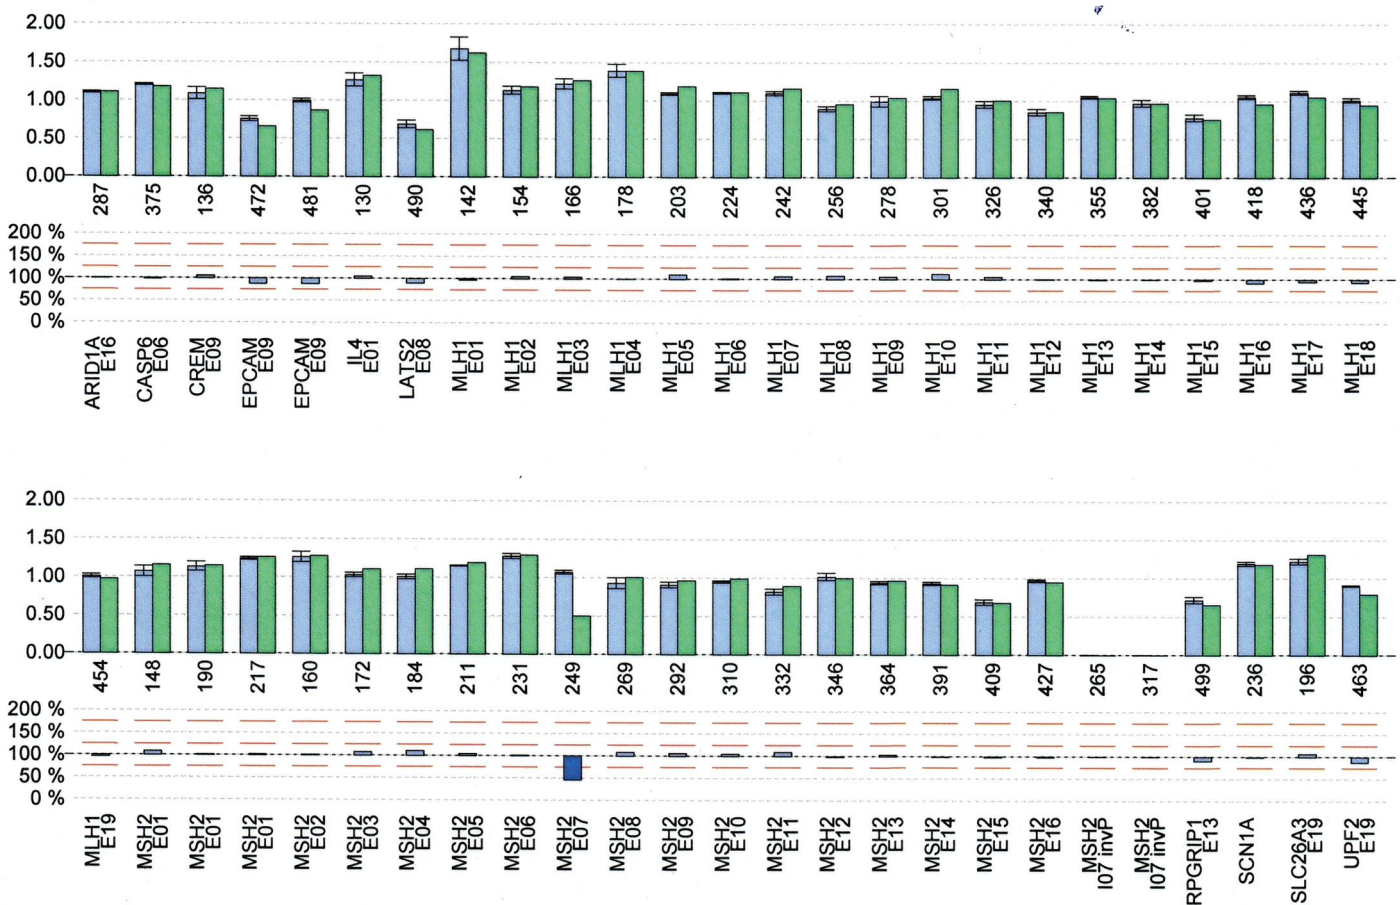

**Comment:**
