# Supplementary material
Source: Research Square preprint supplement (doi:10.21203/rs.3.rs-9017459/v1)
Supplement: Supplementary file 3 [file a506520213aef5699a558e8c.pdf]

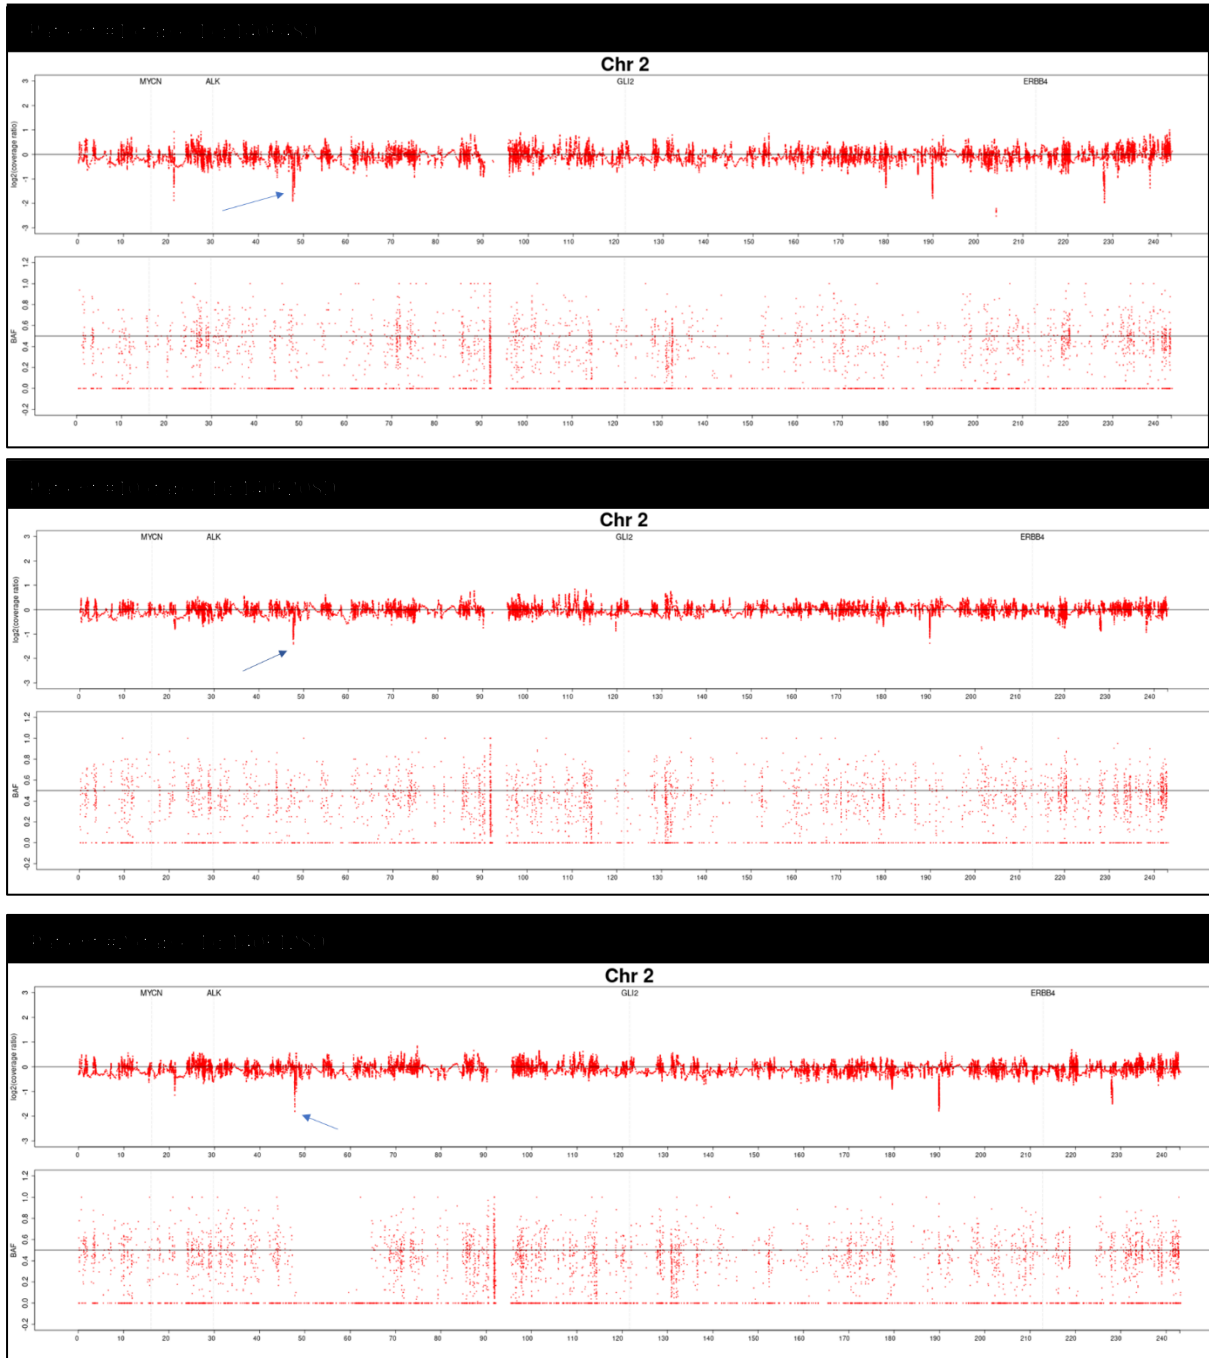

Figure 1: B allele frequency (BAF) plots of patients #1, #10 and #2 with apparent large deletions of MSH2 gene, that look relatively similar to each other, likely representing sequencing artifacts.

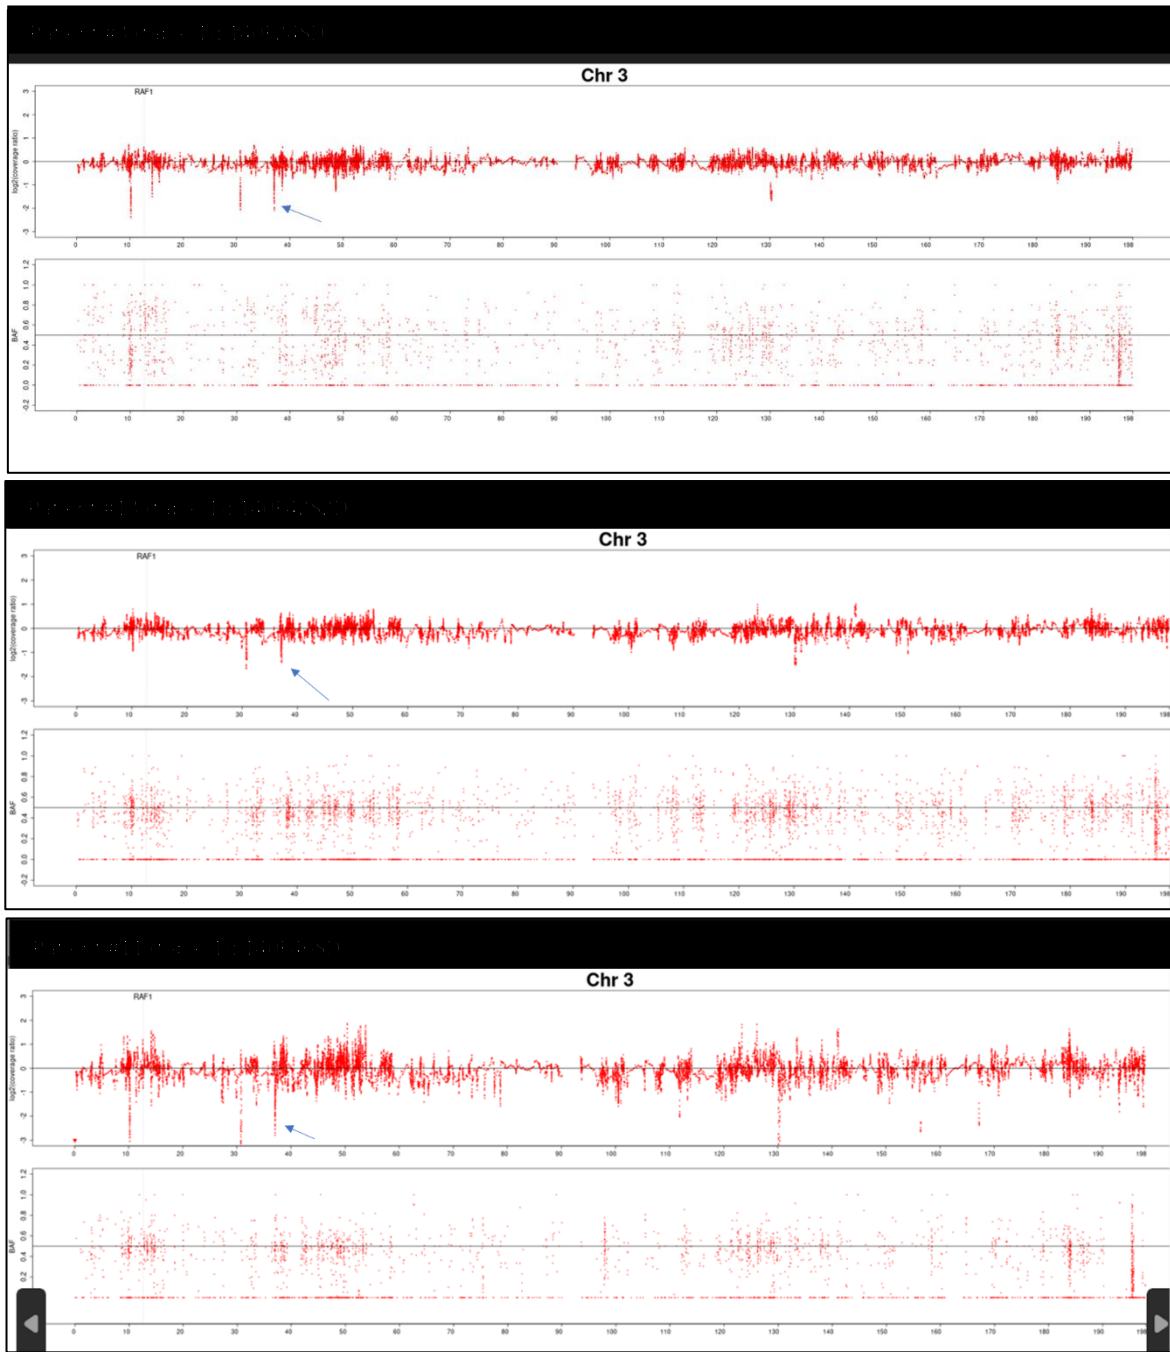

Figure 2: B allele frequency (BAF) plots of patients #3, #13 and #11 with apparent large deletions that look relatively similar to each other, likely representing sequencing artifacts.
